# Supplementary material
Source: publisher figshare collection journal article supplement (https://frontiersin.figshare.com/ndownloader/files/24645626)
Supplement: Supplementary file 1 [file 24645626]

1  
2  
3  
  
4  
  
5

**Supplement: Assessing multi-temporal snow-volume  
trends in High Mountain Asia from 1987-2016 using  
high-resolution passive microwave data**

**T. Smith\* and B. Bookhagen**

<sup>1</sup>Institute of Geosciences, Universität Potsdam, Germany

---

Corresponding author: Taylor Smith, [tasmith@uni-potsdam.de](mailto:tasmith@uni-potsdam.de)

6

## 1 Results

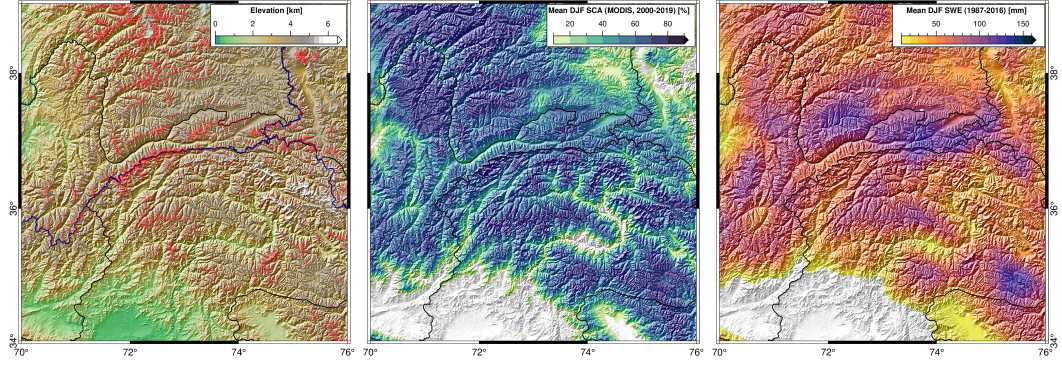

7

**Figure 1.** (A) Elevation, (B) December-January-February snow-covered area, and (C)

8

December-January-February average SWE for the Karakoram region. Glacier outlines in red.

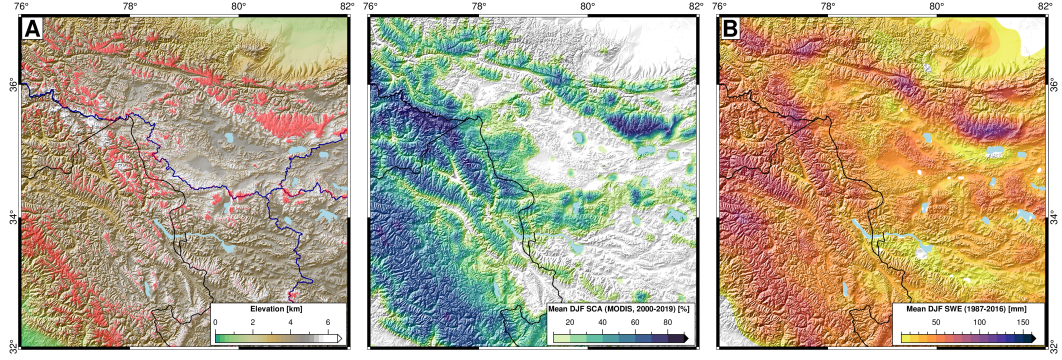

9

**Figure 2.** (A) Elevation, (B) December-January-February snow-covered area, and (C)

10

December-January-February average SWE for the Kunlun Shan region. Glacier outlines in red.

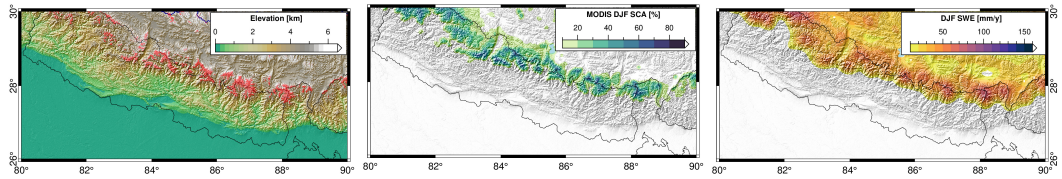

11

**Figure 3.** (A) Elevation, (B) December-January-February snow-covered area, and (C)

12

December-January-February average SWE for the Himalayan region. Glacier outlines in red.

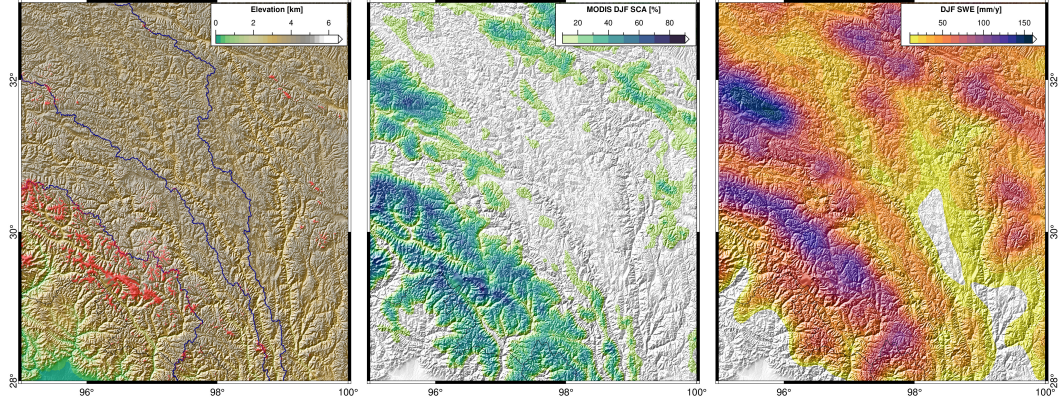

**Figure 4.** (A) Elevation, (B) December-January-February snow-covered area, and (C) December-January-February average SWE for the Eastern Tibet region. Glacier outlines in red.

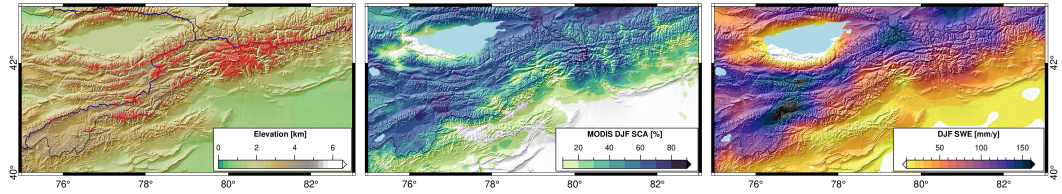

**Figure 5.** (A) Elevation, (B) December-January-February snow-covered area, and (C) December-January-February average SWE for the Tien Shan region. Glacier outlines in red.
